# Supplementary material for: A Convenient Colorimetric Bacteria Detection Method Utilizing Chitosan-Coated Magnetic Nanoparticles
Source: MDPI journal article supplement (doi:10.3390/nano10010092), 2020-01-02

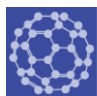

## Supplementary Materials

### A Convenient Colorimetric Bacteria Detection Method Utilizing Chitosan-Coated Magnetic Nanoparticles

Thao Nguyen Le, Tai Duc Tran and Moon Il Kim\*

Department of BioNano Technology, Gachon University, 1342 Seongnamdae-ro, Sujeong-gu, Seongnam, Gyeonggi 13120, Republic of Korea; thaonguyen65949@gmail.com (T.N.L.); tdtai.151294@gmail.com (T.D.T)

\* Correspondence moonil@gachon.ac.kr; Tel.: +82-31-750-8563

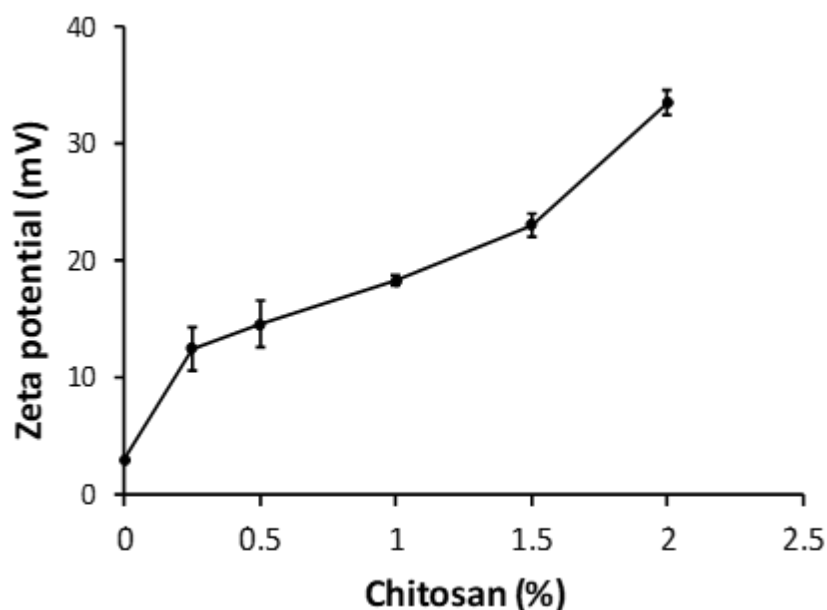

**Figure S1.** Zeta potential analyses of CS-MNPs prepared with different chitosan concentrations.

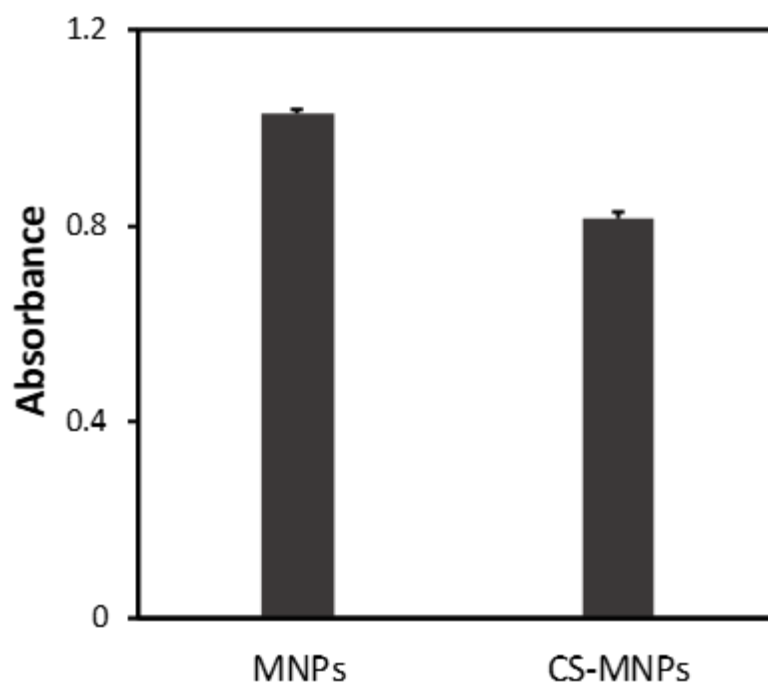

**Figure S2.** Comparison of the peroxidase-like activity between MNPs and CS-MNPs.

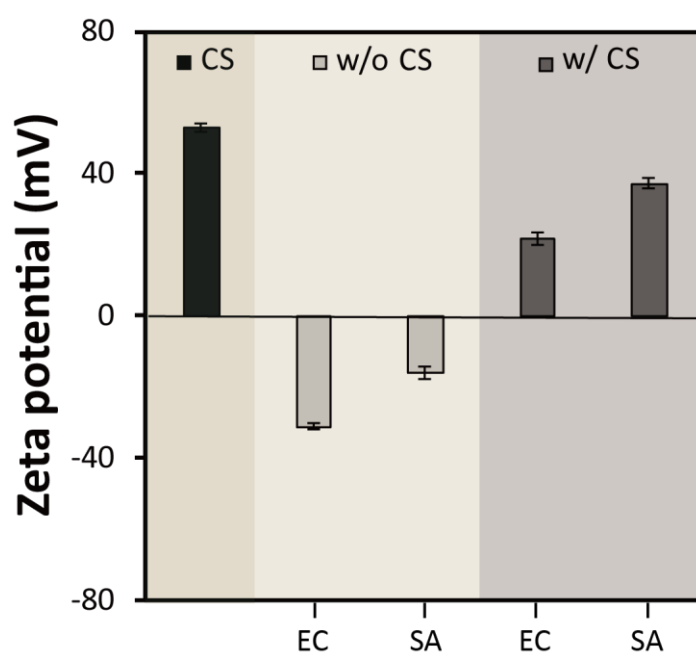

**Figure S3.** Zeta potential analyses of free CS only, bacteria only, and bacteria with free CS. *E. coli* (EC) and *S. aureus* (SA) were used in the experiments.

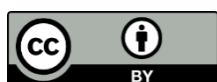

Supplement: s1 [file s1]
